# Supplementary material for: A general analytical model for head response to oscillatory pumping in unconfined aquifers: effects of delayed gravity drainage and initial condition
Source: Copernicus journal article supplement (doi:10.5194/hess-23-1323-2019), 2019-03-08
Supplement: Supplementary file 1 [file hess-23-1323-2019-supplement.pdf]

Supplement of Hydrol. Earth Syst. Sci., 23, 1323–1337, 2019  
<https://doi.org/10.5194/hess-23-1323-2019-supplement>  
© Author(s) 2019. This work is distributed under  
the Creative Commons Attribution 4.0 License.

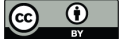

*Supplement of*

**A general analytical model for head response to  
oscillatory pumping in unconfined aquifers: effects  
of delayed gravity drainage and initial condition**

**Ching-Sheng Huang et al.**

*Correspondence to:* Hund-Der Yeh ([hdyeh@mail.nctu.edu.tw](mailto:hdyeh@mail.nctu.edu.tw)) and Tao Yang ([tao.yang@hhu.edu.cn](mailto:tao.yang@hhu.edu.cn))

The copyright of individual parts of the supplement might differ from the CC BY 4.0 License.

## Supporting Material

### 1. Derivation of Eqs. (14a) – (14k)

The methods of Laplace transform and finite-integral transform are applied to solve Eqs. (8) - (13). The former converts  $\bar{h}(\bar{r}, \bar{z}, \bar{t})$  into  $\hat{h}(\bar{r}, \bar{z}, p)$ ,  $\partial \bar{h} / \partial \bar{t}$  in Eq. (8), (11a) into  $p \hat{h}$ , the integration in Eq. (11b) into  $p \hat{h} / (p + a_2)$ , and  $\sin(\gamma \bar{t})$  in Eq. (10) into  $\gamma / (p^2 + \gamma^2)$  with the Laplace parameter  $p$ . The result of Eq. (8) in the Laplace domain can be written as

$$\frac{\partial^2 \hat{h}}{\partial \bar{r}^2} + \frac{1}{\bar{r}} \frac{\partial \hat{h}}{\partial \bar{r}} + \mu \frac{\partial^2 \hat{h}}{\partial \bar{z}^2} = p \hat{h} \quad (\text{A.1})$$

The transformed boundary conditions in  $r$  and  $z$  directions are expressed as

$$\frac{\partial \hat{h}}{\partial \bar{r}} = \begin{cases} \frac{\gamma}{p^2 + \gamma^2} & \text{for } \bar{z}_l \leq \bar{z} \leq \bar{z}_u \\ 0 & \text{outside screen interval} \end{cases} \quad \text{at } \bar{r} = 1 \quad (\text{A.2})$$

$$\frac{\partial \hat{h}}{\partial \bar{z}} = -ap \hat{h} \quad \text{at } \bar{z} = 1 \text{ for IGD} \quad (\text{A.3a})$$

$$\frac{\partial \hat{h}}{\partial \bar{z}} = -\frac{a_1 p \hat{h}}{p + a_2} \quad \text{at } \bar{z} = 1 \text{ for DGD} \quad (\text{A.3b})$$

$$\frac{\partial \hat{h}}{\partial \bar{z}} = 0 \quad \text{at } \bar{z} = 0 \quad (\text{A.4})$$

$$\lim_{\bar{r} \rightarrow \infty} \hat{h}(\bar{r}, \bar{z}, p) = 0 \quad (\text{A.5})$$

The finite-integral transform proposed by Latinopoulos (1985) is applied to  $\hat{h}$  of Eqs.

(A.1) - (A.5). It is defined as

$$\tilde{h}(\beta_n) = \mathfrak{F}\{\hat{h}(\bar{z})\} = \int_0^1 \hat{h}(\bar{z}) F \cos(\beta_n \bar{z}) d\bar{z} \quad (\text{A.6})$$

$$F = \sqrt{\frac{2(\beta_n^2 + c^2)}{\beta_n^2 + c^2 + c}} \quad (\text{A.7})$$

where  $\beta_n$  is the root of Eq. (15), and  $c = ap$  for Eq. (A.3a) and  $a_1 p / (p + a_2)$  for Eq.

(A.3b). On the basis of integration by parts, one can write

$$\mathfrak{F}\left\{\frac{\partial^2 \hat{h}}{\partial \bar{z}^2}\right\} = \int_0^1 \left(\frac{\partial^2 \hat{h}}{\partial \bar{z}^2}\right) F \cos(\beta_n z) d\bar{z} = -\beta_n^2 \tilde{h} \quad (\text{A.8})$$

Note that Eq. (A.8) is applicable only for the no-flow condition specified at  $\bar{z} = 0$  (i.e., Eq.

S.4) and third-type condition specified at  $\bar{z} = 1$  (i.e., Eq. A.3a or A.3b). The formula for the

inverse finite-integral transform is defined as

$$\hat{h}(\bar{z}) = \mathfrak{S}^{-1}\{\tilde{h}(\beta_n)\} = \sum_{n=1}^{\infty} \tilde{h}(\beta_n) F \cos(\beta_n \bar{z}) \quad (\text{A.9})$$

Using Eqs. (A.6) and (A.8) converts  $\hat{h}(\bar{r}, \bar{z}, p)$  into  $\tilde{h}(\bar{r}, \beta_n, p)$  and  $\partial^2 \hat{h} / \partial \bar{z}^2$  in Eq. (A.1) into  $-\beta_n^2 \tilde{h}$  with  $n \in (1, 2, 3, \dots \infty)$ . Eq. (A.1) then becomes an ordinary differential equation (ODE) denoted as

$$\frac{\partial^2 \tilde{h}}{\partial \bar{r}^2} + \frac{1}{\bar{r}} \frac{\partial \tilde{h}}{\partial \bar{r}} - \mu \beta_n^2 \tilde{h} = p \tilde{h} \quad (\text{A.10})$$

with the transformed Eqs. (A.5) and (A.2) written, respectively, as

$$\lim_{\bar{r} \rightarrow \infty} \tilde{h}(\bar{r}, \beta_n, p) = 0 \quad (\text{A.11})$$

$$\frac{\partial \tilde{h}}{\partial \bar{r}} = \frac{\gamma F}{\beta_n (p^2 + \gamma^2)} (\sin(\bar{z}_u \beta_n) - \sin(\bar{z}_l \beta_n)) \quad \text{at} \quad \bar{r} = 1 \quad (\text{A.12})$$

Solving Eq. (A.10) with (A.11) and (A.12) results in

$$\tilde{h}(\bar{r}, \beta_n, p) = - \frac{\gamma F K_0(r\lambda) (\sin(\bar{z}_u \beta_n) - \sin(\bar{z}_l \beta_n))}{\beta_n \lambda K_1(\lambda) (p^2 + \gamma^2)} \quad (\text{A.13})$$

with

$$\lambda = \sqrt{p + \mu \beta_n^2} \quad (\text{A.14})$$

Taking the inverse finite-integral transform to Eq. (A.13) using the formula in Eq. (A.9), the Laplace-domain solution is obtained as

$$\hat{h}(\bar{r}, \bar{z}, p) = 2 \sum_{n=1}^{\infty} \tilde{h}(\bar{r}, \beta_n, p) \cos(\beta_n \bar{z}) \quad (\text{A.15})$$

with

$$\tilde{h}(\bar{r}, \beta_n, p) = \tilde{h}_1(p) \cdot \tilde{h}_2(p) \quad (\text{A.16})$$

$$\tilde{h}_1(p) = \frac{\gamma}{(p^2 + \gamma^2)} \quad (\text{A.17})$$

$$\tilde{h}_2(p) = -\varphi_1 \varphi_2 \quad (\text{A.18})$$

$$\varphi_1 = K_0(\bar{r}\lambda) (\sin(\bar{z}_u \beta_n) - \sin(\bar{z}_l \beta_n)) / (\beta_n \lambda K_1(\lambda)) \quad (\text{A.19})$$

$$\varphi_2 = (\beta_n^2 + c^2) / (\beta_n^2 + c^2 + c) \quad (\text{A.20})$$

Using the Mathematica function InverseLaplaceTransform, the inverse Laplace transform for  $\tilde{h}_1(p)$  in Eq. (A.17) is obtained as

$$\bar{h}_1(\bar{t}) = \sin(\gamma\bar{t}) \quad (\text{A.21})$$

The inverse Laplace transform for  $\tilde{h}_2(p)$  in Eq. (A.18) is written as

$$\tilde{h}_2(\bar{t}) = \frac{1}{2\pi i} \int_{\rho-i\infty}^{\rho+i\infty} \tilde{h}_2(p) e^{p\bar{t}} dp \quad (\text{A.22})$$

where  $\rho$  is a real number being large enough so that all singularities are on the left-hand side of the straight line from  $(\rho, -i\infty)$  to  $(\rho, i\infty)$  in the complex plane. The integrand  $\tilde{h}_2(p)$  is a multiple-value function with a branch point at  $p = -\mu\beta_n^2$  and a branch cut from the point along the negative real axis. In order to reduce  $\tilde{h}_2(p)$  to a single-value function, we consider a modified Bromwich contour that contains a straight line  $\overline{AB}$ ,  $\overline{CD}$  right above the branch cut and  $\overline{EF}$  right below the branch cut, a semicircle with radius  $R$ , and a circle  $\widehat{DE}$  with radius  $r'$  in Fig. S1. According to the residual theory, Eq. (A.22) may be expressed as

$$\tilde{h}_2(\bar{t}) + \lim_{r' \rightarrow 0} \frac{1}{2\pi i} \left[ \int_B^C \tilde{h}_2(p) e^{p\bar{t}} dp + \int_C^D \tilde{h}_2(p) e^{p\bar{t}} dp + \int_D^E \tilde{h}_2(p) e^{p\bar{t}} dp + \int_E^F \tilde{h}_2(p) e^{p\bar{t}} dp + \int_F^A \tilde{h}_2(p) e^{p\bar{t}} dp \right] = 0 \quad (\text{A.23})$$

where zero on the right-hand side (RHS) is due to no pole in the complex plane. The integrations for paths  $\widehat{BA}$  (i.e.  $\int_B^C \tilde{h}_2(p) e^{p\bar{t}} dp + \int_F^A \tilde{h}_2(p) e^{p\bar{t}} dp$ ) with  $R \rightarrow \infty$  and  $\widehat{DE}$  (i.e.  $\int_D^E \tilde{h}_2(p) e^{p\bar{t}} dp$ ) with  $r' \rightarrow 0$  equal zero. The path  $\overline{CD}$  starts from  $p = -\infty$  to  $p = -\mu\beta_n^2$  and  $\overline{EF}$  starts from  $p = -\mu\beta_n^2$  to  $p = -\infty$ . Eq. (A.23) therefore reduces to

$$\tilde{h}_2(\bar{t}) = -\frac{1}{2\pi i} \left( \int_{-\infty}^{-\mu\beta_n^2} \tilde{h}_2(p^+) e^{p^+\bar{t}} dp + \int_{-\mu\beta_n^2}^{-\infty} \tilde{h}_2(p^-) e^{p^-\bar{t}} dp \right) \quad (\text{A.24})$$

where  $p^+$  and  $p^-$  are complex numbers right above and below the real axis, respectively.

Consider  $p^+ = \zeta e^{i\pi} - \mu\beta_n^2$  and  $p^- = \zeta e^{-i\pi} - \mu\beta_n^2$  in the polar coordinate system with the origin at  $(-\mu\beta_n^2, 0)$  in the complex plane. Eq. (A.24) then becomes

$$\tilde{h}_2(\bar{t}) = \frac{-1}{2\pi i} \int_0^\infty \tilde{h}_2(p^+) e^{p^+\bar{t}} dp - \tilde{h}_2(p^-) e^{p^-\bar{t}} d\zeta \quad (\text{A.25})$$

where  $p^+$  and  $p^-$  lead to the same result of  $p_0 = -\zeta - \mu\beta_n^2$  for a given  $\zeta$ ;  $\lambda = \sqrt{p + \mu\beta_n^2}$  equals  $\lambda_0 = \sqrt{\zeta}i$  for  $p = p^+$  and  $-\lambda_0$  for  $p = p^-$ . Note that  $\tilde{h}_2(p^+) e^{p^+\bar{t}}$  and

$\tilde{h}_2(p^-) e^{p^-\bar{t}}$  are in terms of complex numbers. The numerical result of the integrand in Eq. (A.25) must be a pure imaginary number that is exactly twice of the imaginary part of a complex number from  $\tilde{h}_2(p^+) e^{p^+\bar{t}}$  with  $p^+ = p_0$  and  $\lambda = \lambda_0$ . The inverse Laplace transform for  $\tilde{h}_2(p)$  can be written as

$$\tilde{h}_2(\bar{t}) = \frac{-1}{\pi} \int_0^\infty \text{Im}(\varphi_1 \varepsilon_2 e^{p_0 \bar{t}}) d\zeta \quad (\text{A.26})$$

where  $p = p_0$ ;  $\lambda = \lambda_0$ ;  $\varphi_1$  and  $\varepsilon_2$  are respectively defined in Eqs. (A.19) and (14i).

According to the convolution theory, the inverse Laplace transform for  $\tilde{h}(\bar{r}, \beta_n, p)$  is

$$\tilde{h}(\bar{r}, \beta_n, \bar{t}) = \int_0^{\bar{t}} \tilde{h}_2(\bar{t}') \bar{h}_1(\bar{t} - \bar{t}') d\bar{t}' \quad (\text{A.27})$$

where  $\bar{h}_1(\bar{t} - \bar{t}') = \sin(\gamma(\bar{t} - \bar{t}'))$  based on Eq. (A.21);  $\tilde{h}_2(\bar{t}')$  is defined in Eq. (A.26) with

$\bar{t} = \bar{t}'$ . Eq. (A.27) can reduce to

$$\tilde{h}(\bar{r}, \beta_n, \bar{t}) = \frac{-1}{\pi} \int_0^\infty \text{Im} \left( \frac{\varphi_1 \varepsilon_2 (\gamma e^{p_0 \bar{t}} - \gamma \cos(\gamma \bar{t}) - p_0 \sin(\gamma \bar{t}))}{p_0^2 + \gamma^2} \right) d\zeta \quad (\text{A.28})$$

Substituting  $\tilde{h}(\bar{r}, \beta_n, p) = \tilde{h}(\bar{r}, \beta_n, \bar{t})$  and  $\hat{h}(\bar{r}, \bar{z}, p) = \bar{h}(\bar{r}, \bar{z}, \bar{t})$  into Eq. (A.15) and rearranging the result leads to

$$\begin{aligned} \bar{h}(\bar{r}, \bar{z}, \bar{t}) = & \frac{-2\gamma}{\pi} \sum_{n=1}^\infty \int_0^\infty \cos(\beta_n \bar{z}) \exp(p_0 \bar{t}) \text{Im}(\varepsilon_1 \varepsilon_2) d\zeta + \\ & \frac{2}{\pi} \sum_{n=1}^\infty \int_0^\infty \cos(\beta_n \bar{z}) \text{Im}(\varepsilon_1 \varepsilon_2 (\gamma \cos(\gamma \bar{t}) + p_0 \sin(\gamma \bar{t}))) d\zeta \end{aligned} \quad (\text{A.29})$$

where  $\varepsilon_1$  and  $\varepsilon_2$  are defined in Eqs. (14h) and (14i), respectively; the first RHS term equals

$\bar{h}_{\text{exp}}(\bar{r}, \bar{z}, \bar{t})$  defined in Eq. (14b); the second term is denoted as  $\bar{h}_{\text{SHM}}(\bar{r}, \bar{z}, \bar{t})$  defined in Eq.

(14c). Finally, the complete solution is expressed as Eqs. (14a) – (14k).

## 2. Derivation of Eqs. (23a) – (23m)

Applying the Weber transform to  $\bar{H}$  of Eqs. (18) – (22) yields

$$\tilde{H}(\xi) = \mathcal{W}\{\bar{H}\} = \int_1^\infty \bar{H} \bar{r} \Omega dr \quad (\text{B.1})$$

where  $\Omega$  is defined in Eq. (23g). With the integration by parts, the transform has the property

that

$$\mathcal{W} \left\{ \frac{\partial^2 \bar{H}}{\partial \bar{r}^2} + \frac{1}{\bar{r}} \frac{\partial \bar{H}}{\partial \bar{r}} \right\} = -\xi^2 \tilde{H} - \frac{2}{\pi \xi} \frac{d\bar{H}}{d\bar{r}} \Big|_{\bar{r}=1} \quad (\text{B.2})$$

where  $\xi$  is the Weber parameter and the second RHS term represents the Neumann boundary condition, i.e., Eq. (19). The formula for the inversion can be written as

$$\bar{H} = \mathcal{W}^{-1}\{\tilde{H}\} = \int_0^\infty \tilde{H} \xi \Omega d\xi \quad (\text{B.3})$$

Taking the transform to Eqs. (18) - (22) converts  $\bar{H}$  into  $\tilde{H}$  and  $\partial^2 \bar{H} / \partial \bar{r}^2 + \bar{r}^{-1} \partial \bar{H} / \partial \bar{r}$  into  $-\xi^2 \tilde{H} - 2 / (\pi \xi) \partial \tilde{H} / \partial \bar{r} |_{\bar{r}=1}$ . The result is expressed as

$$\frac{\partial^2 \tilde{H}}{\partial \bar{z}^2} - \lambda_w^2 \tilde{H} = \begin{cases} 0 & \text{for } \bar{z}_u < \bar{z} \leq 1 \\ \frac{2}{\pi \mu \xi} & \text{for } \bar{z}_l \leq \bar{z} \leq \bar{z}_u \\ 0 & \text{for } 0 \leq \bar{z} < \bar{z}_l \end{cases} \quad (\text{B.4})$$

$$\frac{\partial \tilde{H}}{\partial \bar{z}} = -i a \gamma \tilde{H} \quad \text{at } \bar{z} = 1 \quad (\text{B.5})$$

$$\frac{\partial \tilde{H}}{\partial \bar{z}} = 0 \quad \text{at } \bar{z} = 0 \quad (\text{B.6})$$

Eq. (B.4) can be separated as

$$\begin{cases} \partial^2 \tilde{H}_u / \partial \bar{z}^2 - \lambda_w^2 \tilde{H}_u = 0 & \text{for } \bar{z}_u < \bar{z} \leq 1 \\ \partial^2 \tilde{H}_m / \partial \bar{z}^2 - \lambda_w^2 \tilde{H}_m = 2 / (\pi \mu \xi) & \text{for } \bar{z}_l \leq \bar{z} \leq \bar{z}_u \\ \partial^2 \tilde{H}_l / \partial \bar{z}^2 - \lambda_w^2 \tilde{H}_l = 0 & \text{for } 0 \leq \bar{z} < \bar{z}_l \end{cases} \quad (\text{B.7})$$

with the continuity requirements:

$$\begin{cases} \tilde{H}_m = \tilde{H}_u \\ \partial \tilde{H}_m / \partial \bar{z} = \partial \tilde{H}_u / \partial \bar{z} \end{cases} \quad \text{at } \bar{z} = \bar{z}_u \quad (\text{B.8})$$

$$\begin{cases} \tilde{H}_l = \tilde{H}_m \\ \partial \tilde{H}_l / \partial \bar{z} = \partial \tilde{H}_m / \partial \bar{z} \end{cases} \quad \text{at } \bar{z} = \bar{z}_l \quad (\text{B.9})$$

Solving Eq. (B.7) with (B.5), (B.6), (B.8), and (B.9) results in Eqs. (23h) – (23m). The solution of  $\bar{H}$  defined in Eq. (23f) can be obtained by the formula Eq. (B.3) for the inverse Weber transform.

### 3. Derivation of Eq. (24)

Applying the finite Fourier cosine transform to the model, Eqs. (18) – (22) with  $S_y = 0$  (i.e.,  $a = 0$ ) for the confined condition converts  $\bar{H}$  into  $\hat{H}$  and  $\partial^2 \bar{H} / \partial \bar{z}^2$  into  $(m\pi)^2 \hat{H}$  with  $m$  being an integer from 0, 1, 2, ...  $\infty$ . The result is written as

$$\frac{\partial^2 \hat{H}}{\partial \bar{r}^2} + \frac{1}{\bar{r}} \frac{\partial \hat{H}}{\partial \bar{r}} - \lambda_m^2 \hat{H} = 0 \quad (\text{C.1})$$

$$\frac{\partial \hat{H}}{\partial \bar{r}} = \begin{cases} \bar{z}_u - \bar{z}_l & \text{for } m = 0 \\ \frac{1}{m\pi} (\sin(\bar{z}_u m\pi) - \sin(\bar{z}_l m\pi)) & \text{for } m > 0 \end{cases} \quad \text{at } \bar{r} = 1 \quad (\text{C.2})$$

$$\lim_{\bar{r} \rightarrow \infty} \hat{H} = 0 \quad (\text{C.3})$$

where  $\lambda_m^2 = \gamma i + \mu(m\pi)^2$ , and  $\bar{z}_u - \bar{z}_l$  results from  $\lim_{m \rightarrow 0} (\sin(\bar{z}_u m\pi) - \sin(\bar{z}_l m\pi)) / (m\pi)$

using L' Hospital's rule. Solving Eq. (C.1) with (C.2) and (C.3) results in

$$\hat{H}(\bar{r}) = \frac{-K_0(\bar{r}\lambda_m)}{\lambda_m K_1(\lambda_m)} \times \begin{cases} \bar{z}_u - \bar{z}_l & \text{for } m = 0 \\ \frac{1}{m\pi} (\sin(\bar{z}_u m\pi) - \sin(\bar{z}_l m\pi)) & \text{for } m > 0 \end{cases} \quad (\text{C.4})$$

After applying the inversion to Eq. (C.4) yields Eq. (24).

**Figure**

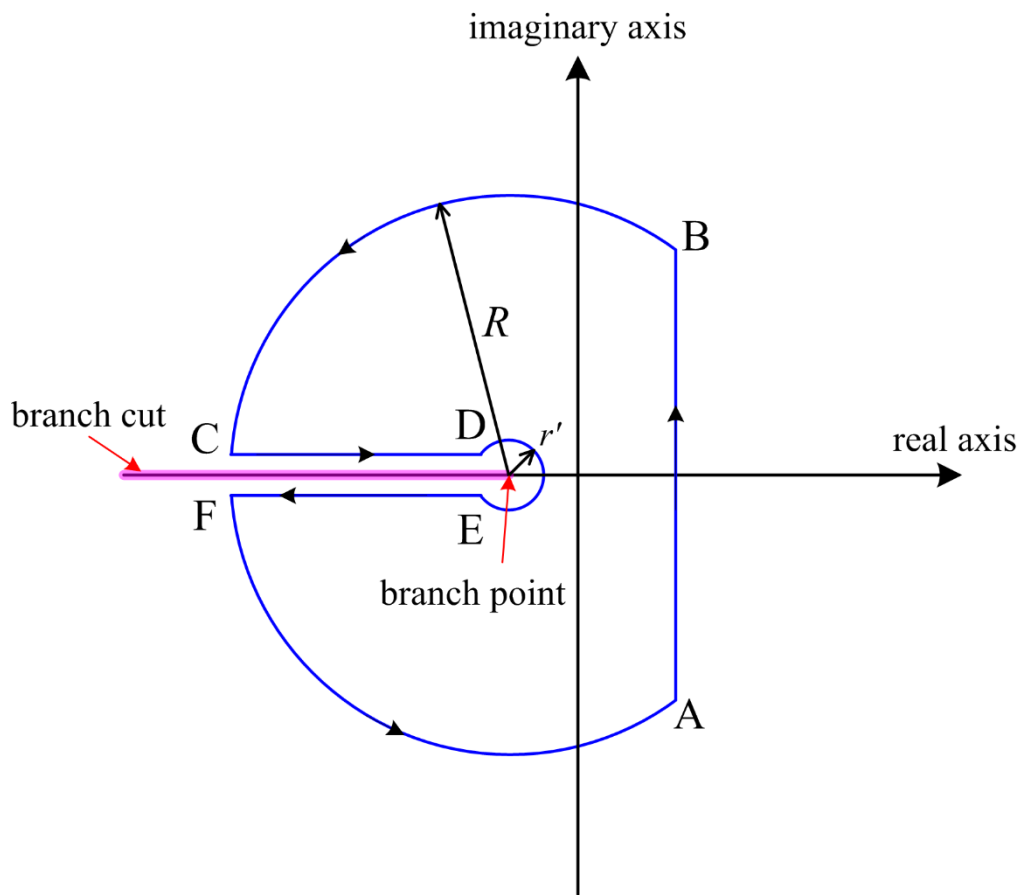

**Figure S1.** Modified Bromwich contour for the inverse Laplace transform to a multiple-value function with a branch point and a branch cut
